# Supplementary material
Source: MDPI journal article supplement (https://www.mdpi.com/2571-9637/7/1/3)
Supplement: s1 [file s1 › surfaces-2673018-supplementary.pdf]

# Electronic Supplementary Information (ESI)

## The Role of Mn Doping and $\text{Ti}^{3+}$ Defects at $\text{TiO}_2$ Surfaces Reacting with NO and $\text{SO}_2$ Gases Investigated Using Near-Ambient Pressure X-ray Photoelectron Spectroscopy

Jack Chun-Ren Ke,<sup>ab</sup> Andrew Thomas,<sup>ab\*</sup> Joseph Peake,<sup>c</sup> and Robert Sayer<sup>c</sup>

*a. Department of Materials, The University of Manchester, Oxford Road, Manchester M13 9PL, UK*

*b. Photon Science Institute and Henry Royce Institute, The University of Manchester, Oxford Road, Manchester M13 9PL, UK*

*c. Croda Europe Ltd., Cheshire WA8 8UB, UK*

### Corresponding authors (emails)

Dr A.G. Thomas: [andrew.g.thomas@manchester.ac.uk](mailto:andrew.g.thomas@manchester.ac.uk)

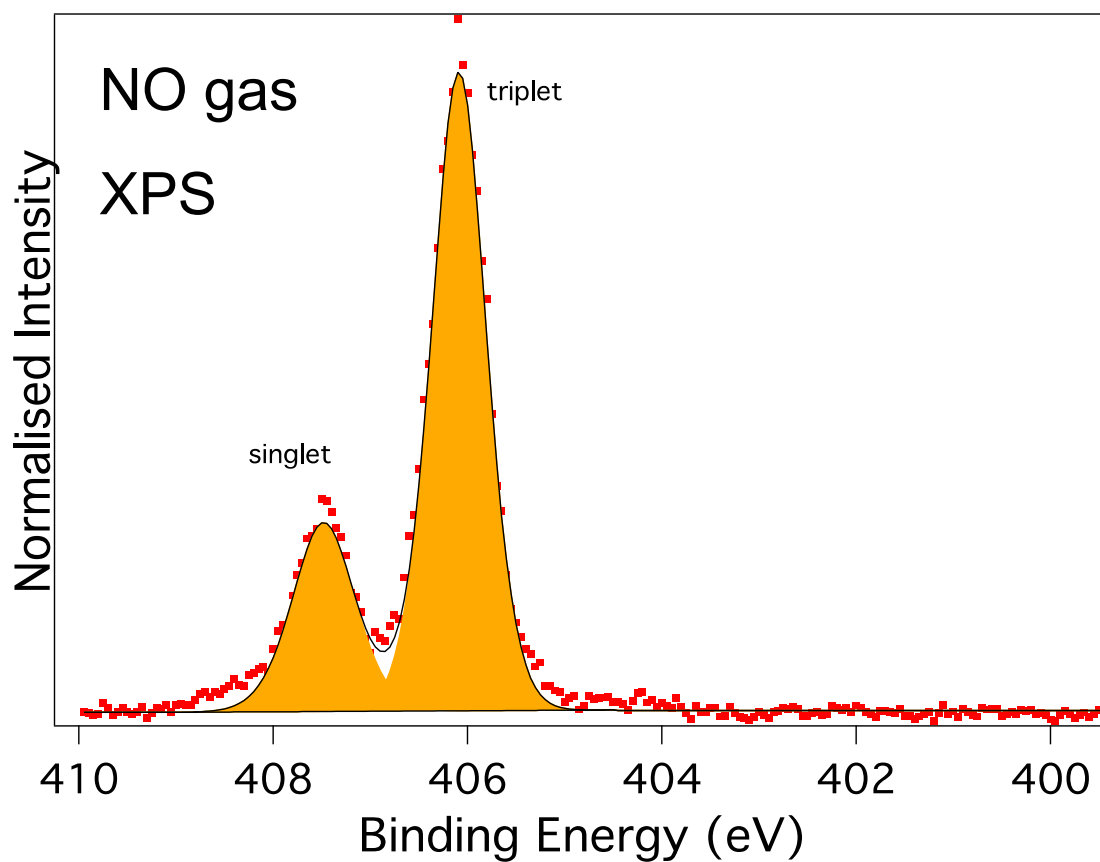

**Figure S1** N 1s XPS spectrum of NO gas molecules during exposure to 1 mbar NO gas with the substrate was retracted from the analysis region. The two peaks arise from triplet/singlet splitting due to the paramagnetic electronic structure of NO.

|                          | Sample                       | s-TiO <sub>2</sub> | r-TiO <sub>2</sub> | Mn-doped<br>s-TiO <sub>2</sub> | Mn-doped<br>r-TiO <sub>2</sub> |
|--------------------------|------------------------------|--------------------|--------------------|--------------------------------|--------------------------------|
| <i>During</i>            | NO <sub>3</sub> <sup>-</sup> | 0.03±0.01          | 0.08±0.02          | 0.06±0.02                      | 0.16±0.02                      |
|                          | NO <sub>2</sub> <sup>-</sup> | N.D.*              | N.D.               | N.D.                           | 0.25±0.05                      |
|                          | <b>Total N</b>               | <b>0.03±0.01</b>   | <b>0.08±0.02</b>   | <b>0.06±0.02</b>               | <b>0.41±0.05</b>               |
| <i>After 1<br/>hour</i>  | NO <sub>3</sub> <sup>-</sup> | 0.04±0.01          | 0.06±0.01          | 0.06±0.01                      | 0.23±0.05                      |
|                          | NO <sub>2</sub> <sup>-</sup> | N.D.               | N.D.               | N.D.                           | 0.12±0.02                      |
|                          | <b>Total N</b>               | <b>0.04±0.01</b>   | <b>0.06±0.01</b>   | <b>0.06±0.01</b>               | <b>0.35±0.05</b>               |
| <i>After 2<br/>hours</i> | NO <sub>3</sub> <sup>-</sup> | 0.04±0.01          | 0.06±0.01          | 0.06±0.01                      | 0.26±0.05                      |
|                          | NO <sub>2</sub> <sup>-</sup> | N.D.               | N.D.               | N.D.                           | 0.07±0.01                      |
|                          | <b>Total N</b>               | <b>0.04±0.01</b>   | <b>0.06±0.01</b>   | <b>0.06±0.01</b>               | <b>0.33±0.05</b>               |

**Table S1:** N-components at the single crystal surface for the various surface treatments following exposure to NO gas and after 1 and 2 hours. \*N.D. = not detected.

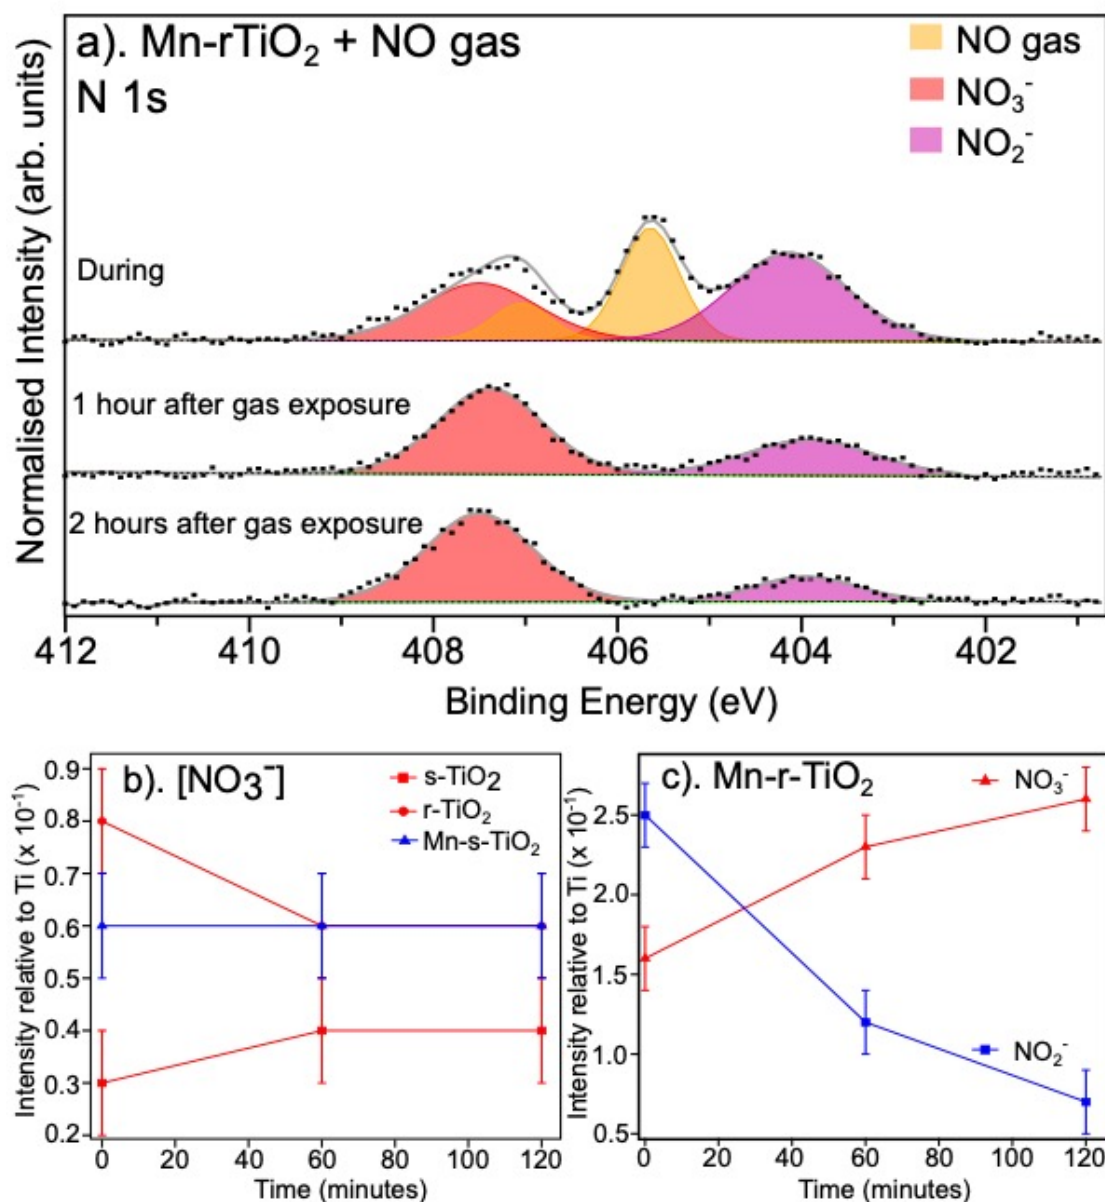

**Figure S2** a) N 1s NAP-XPS spectra of the Mn-doped defective rutile (110) single crystal during and 1 hour and 2 hours after exposure to 1 mbar to show the evolution of the NO-conversion by-products. b) NO<sub>3</sub><sup>-</sup> concentration for the stoichiometric (s-TiO<sub>2</sub>), reduced (r-TiO<sub>2</sub>) and Mn-doped stoichiometric single crystals over time showing little change over time and c) NO<sub>3</sub><sup>-</sup> and NO<sub>2</sub><sup>-</sup> concentrations on the Mn-doped reduced TiO<sub>2</sub> (Mn-r-TiO<sub>2</sub>) with time. It appears NO<sub>2</sub><sup>-</sup> is converted to NO<sub>3</sub><sup>-</sup> over time, although there is also a slight decrease in the overall N-concentration at the surface over time.

|                                                         | Sample           | r-TiO <sub>2</sub> | Mn-doped<br>s-TiO <sub>2</sub> | Mn-doped<br>r-TiO <sub>2</sub> * |
|---------------------------------------------------------|------------------|--------------------|--------------------------------|----------------------------------|
| <b><i>Before<br/>exposure<br/>to SO<sub>2</sub></i></b> | Ti <sup>3+</sup> | 31.3±5             | 5.5±1                          | 66.7±5                           |
|                                                         | Ti <sup>4+</sup> | 68.7±5             | 94.5±1                         | 33.3±5                           |
| <b><i>During</i></b>                                    | Ti <sup>3+</sup> | 36.2±5             | 2.8±1                          | 55.3±5                           |
|                                                         | Ti <sup>4+</sup> | <u>63.8±5</u>      | <u>97.2±1</u>                  | <u>44.7±5</u>                    |
| <b><i>After</i></b>                                     | Ti <sup>3+</sup> | <u>35.3±5</u>      | <u>2.9±1</u>                   | <u>52.2±5</u>                    |
|                                                         | Ti <sup>4+</sup> | <u>64.7±5</u>      | <u>97.1±1</u>                  | <u>47.8±5</u>                    |

**Table S2.** Ti<sup>3+</sup>:Ti<sup>4+</sup> ratios for the various surface treatments during and after exposure to a SO<sub>2</sub>/Ar gas mixture. \*Note that the Mn-doped r-TiO<sub>2</sub> sample was heavily reduced and that the Ti<sup>3+</sup> component is likely also to contain some other low oxidation states of Ti (i.e. Ti<sup>2+</sup>)

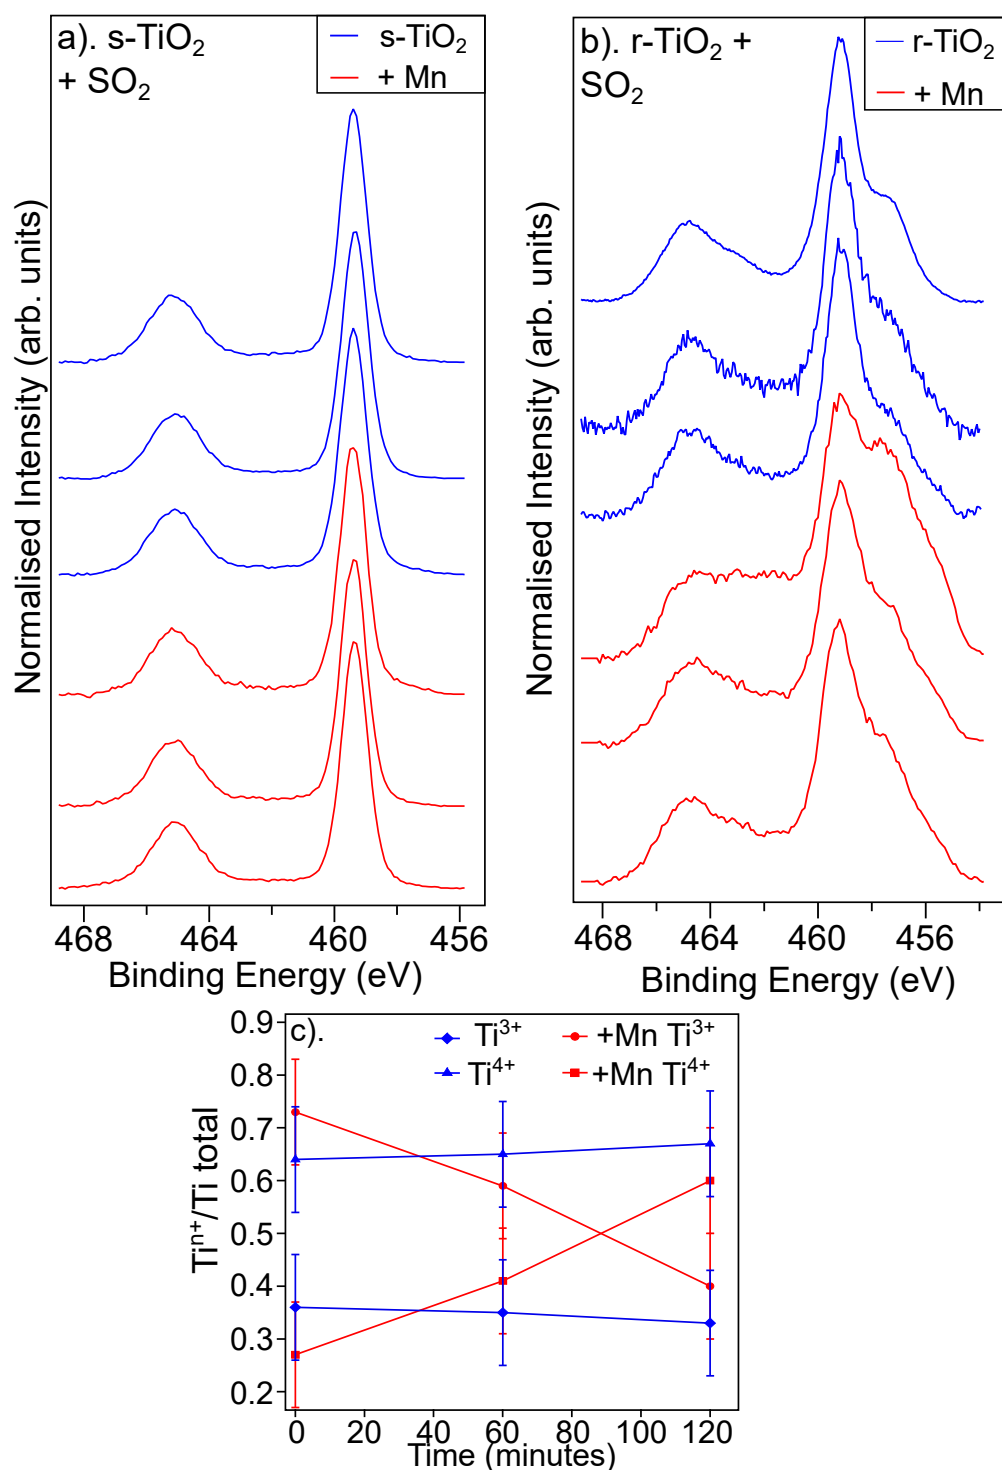

**Figure S3.** Ti 2p spectra recorded from a). stoichiometric TiO<sub>2</sub>(110) with and without Mn doping before during and after exposure to SO<sub>2</sub> in Ar gas, and b) reduced TiO<sub>2</sub>(110) with and without Mn doping before during and after exposure to SO<sub>2</sub> in Ar gas. c). shows the variation in Ti<sup>3+</sup> and Ti<sup>4+</sup> peak areas for the two reduced surfaces from b) indicating that there is only minimal change in Ti<sup>3+</sup> removal in the reduced surface but that the Mn-doped surface leads to reoxidation of the TiO<sub>2</sub> surface by the SO<sub>2</sub>/Ar gas mixture.

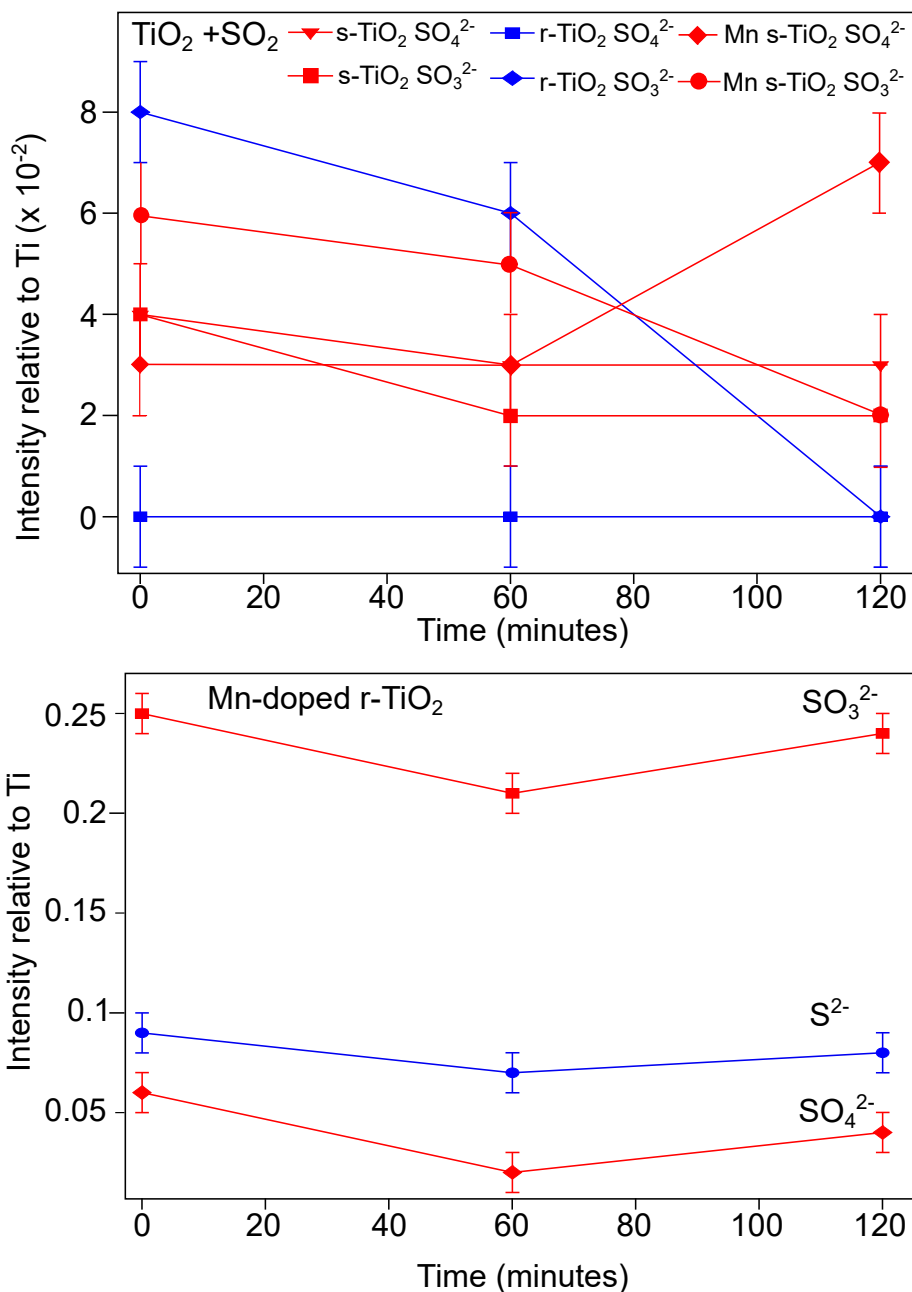

**Figure S4.** The top panel shows the amount of SO<sub>3</sub><sup>2-</sup> and SO<sub>4</sub><sup>2-</sup> species found on stoichiometric (s-TiO<sub>2</sub>) and reduced (r-TiO<sub>2</sub>) single crystal TiO<sub>2</sub>(110) surfaces, along with the Mn-doped stoichiometric TiO<sub>2</sub> surface (Mn s-TiO<sub>2</sub>) relative to the Ti 2p<sub>3/2</sub> peak area. The lower panel shows the sulphur species for the Mn-doped reduced surface, where an additional feature for sulphide species is observed. The sulphide content remains constant and is accompanied by a decrease in Ti<sup>3+</sup> as shown in Figure S3.

|                          | Sample                        | s-TiO <sub>2</sub> | r-TiO <sub>2</sub> | Mn-doped<br>s-TiO <sub>2</sub> | Mn-doped<br>r-TiO <sub>2</sub> |
|--------------------------|-------------------------------|--------------------|--------------------|--------------------------------|--------------------------------|
| <i>During</i>            | SO <sub>4</sub> <sup>2-</sup> | 0.04±0.01          | N.D.               | 0.03±0.01                      | 0.06±0.02                      |
|                          | SO <sub>3</sub> <sup>2-</sup> | 0.04±0.01          | 0.08±0.02          | 0.06±0.01                      | 0.25±0.05                      |
|                          | S <sup>2-</sup>               | N.D.*              | N.D.               | N.D.                           | 0.09±0.01                      |
|                          | <b>Total S</b>                | <b>0.08±0.02</b>   | <b>0.08±0.02</b>   | <b>0.09±0.02</b>               | <b>0.40±0.05</b>               |
| <i>After 1<br/>hour</i>  | SO <sub>4</sub> <sup>2-</sup> | 0.03±0.01          | N.D.               | 0.03±0.01                      | 0.02±0.05                      |
|                          | SO <sub>3</sub> <sup>2-</sup> | 0.02±0.01          | 0.06±0.01          | 0.05±0.01                      | 0.21±0.02                      |
|                          | S <sup>2-</sup>               | N.D.               | N.D.               | N.D.                           | 0.07±0.01                      |
|                          | <b>Total S</b>                | <b>0.05±0.02</b>   | <b>0.06±0.01</b>   | <b>0.08±0.02</b>               | <b>0.30±0.05</b>               |
| <i>After 2<br/>hours</i> | SO <sub>4</sub> <sup>2-</sup> | 0.03±0.01          | N.D.               | 0.07±0.01                      | 0.04±0.01                      |
|                          | SO <sub>3</sub> <sup>2-</sup> | 0.02±0.01          | 0.05±0.01          | 0.02±0.01                      | 0.24±0.05                      |
|                          | S <sup>2-</sup>               | N.D.               | N.D.               | N.D.                           | 0.08±0.01                      |
|                          | <b>Total S</b>                | <b>0.05±0.02</b>   | <b>0.05±0.01</b>   | <b>0.09±0.01</b>               | <b>0.36±0.05</b>               |

**Table S3:** S-components at the single crystal surface for the various surface treatments following exposure to SO<sub>2</sub> in Ar gas and after 1 and 2 hours. \*N.D. = not detected.

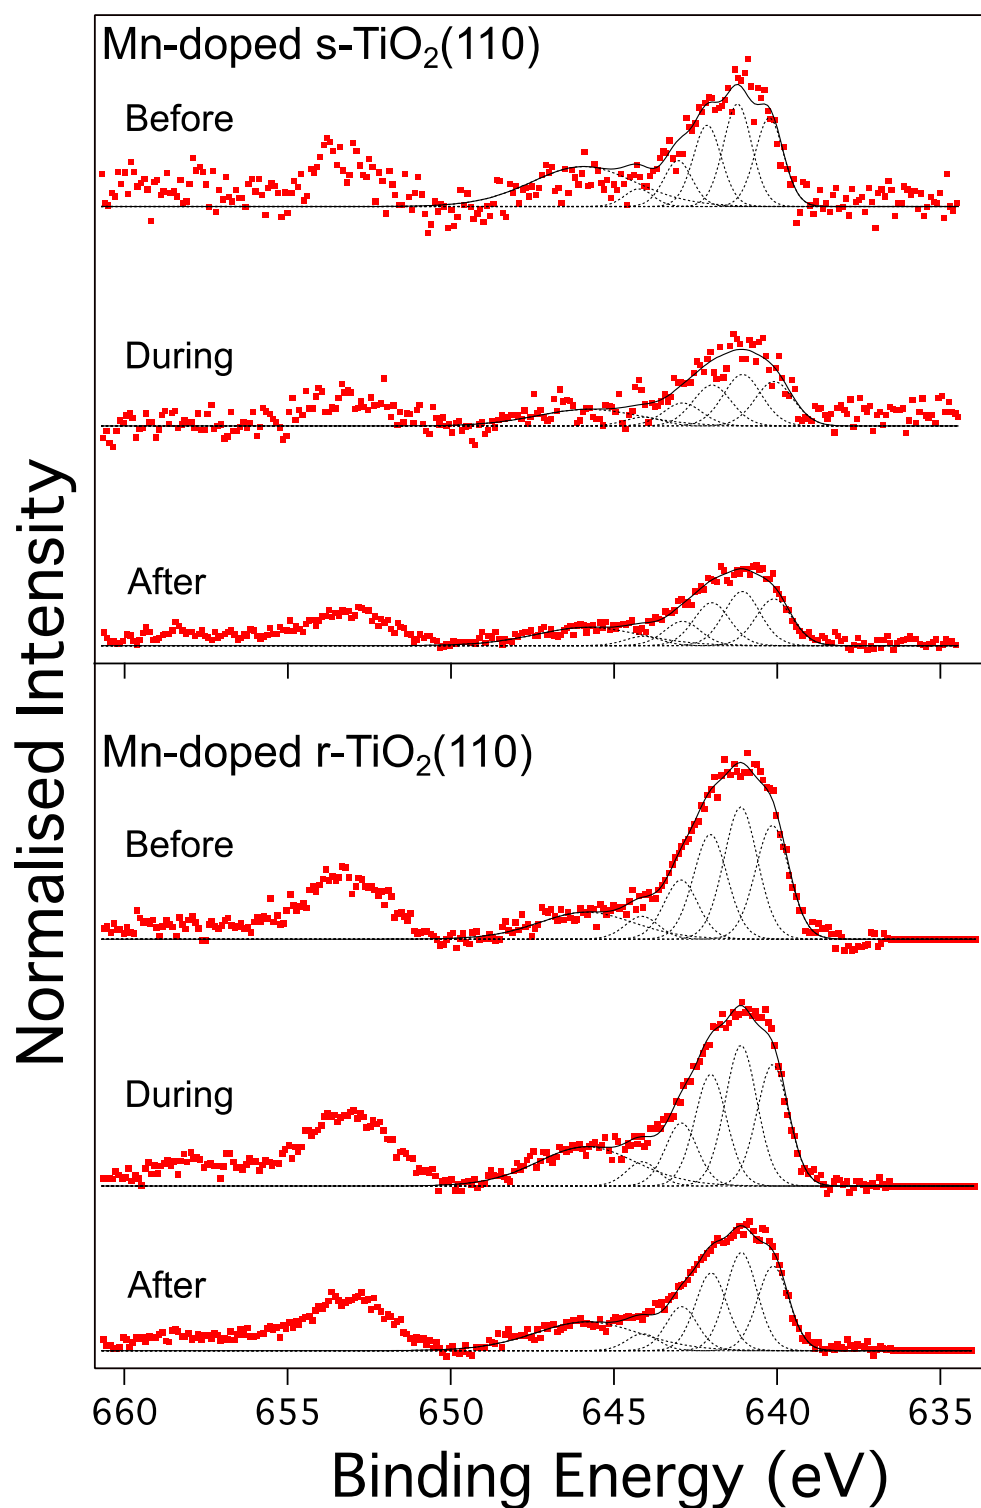

**Figure S5.** Mn 2p spectra following deposition of Mn on stoichiometric TiO<sub>2</sub>(110) (top) and reduced TiO<sub>2</sub>(110) (bottom panel). Spectra are shown fitted with multiplet fitting for MnO (Mn<sup>2+</sup>)[1], before during and after exposure to SO<sub>2</sub> gas. No significant changes are observed in the Mn 2p spectra. The spectra recorded from the r-TiO<sub>2</sub> sample have a better signal to noise ratio, associated with the higher uptake of Mn on this surface (see main manuscript).

| O-species and binding energy(eV) | s-TiO <sub>2</sub> (110) | r-TiO <sub>2</sub> (110) | s-TiO <sub>2</sub> (110) + Mn | r-TiO <sub>2</sub> (110) + Mn | Croda 1 (Mn) | Croda 2 |
|----------------------------------|--------------------------|--------------------------|-------------------------------|-------------------------------|--------------|---------|
| <b>Oxide</b><br>(530.6)          | 86.4                     | 80.3                     | 87.2                          | 72.5                          | 72.5         | 84.6    |
| <b>Ti-OH</b><br>(531.7)          | 8.9                      | 14.2                     | 10.0                          | 18.8                          | 16.7         | 6.3     |
| <b>H<sub>2</sub>O</b><br>(532.7) | 4.8                      | 5.6                      | 2.8                           | 8.7                           | 10.8         | 9.1     |

**Table S4.** Contributions of different O-species to the O 1s spectra for the different sample treatments and samples. Peak assignments are taken from Jackman *et al.* [2] Binding energies for the different O-contributions are given in parentheses.

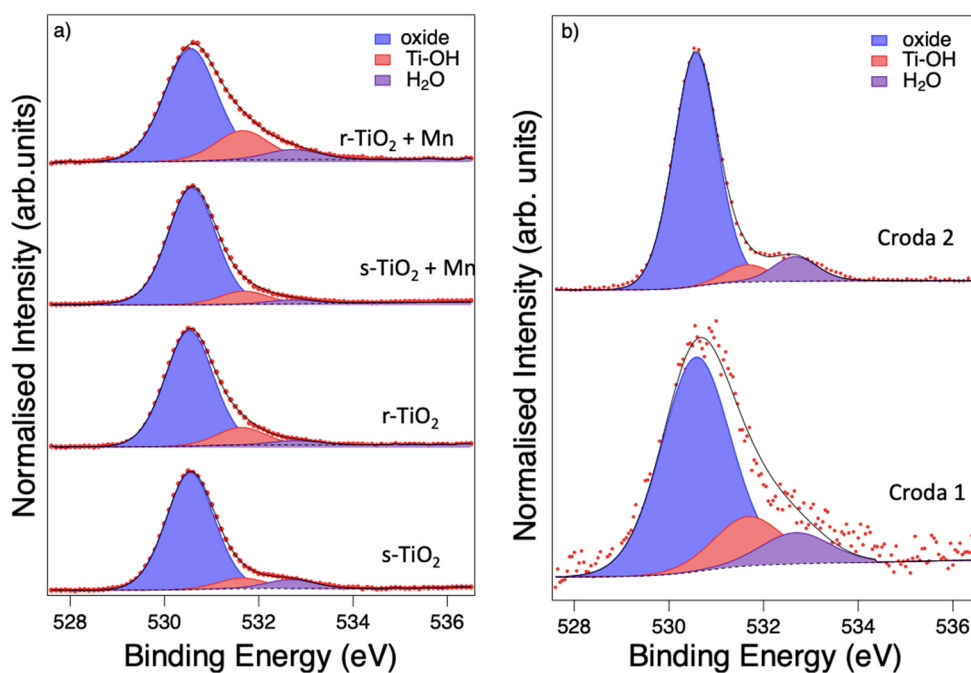

**Figure S6.** O 1s spectra recorded from a) single crystal samples s-TiO<sub>2</sub>, r-TiO<sub>2</sub>, s-TiO<sub>2</sub>+Mn and r-TiO<sub>2</sub>+Mn and b) Croda 1 and Croda 2. Peak binding energies and assignments are in good agreement with those seen for water adsorption on anatase TiO<sub>2</sub> [2].

| Sample                     | Total N   | NO <sub>3</sub> <sup>-</sup> | NO <sub>ads</sub> | Total S   | SO <sub>4</sub> <sup>2-</sup> | SO <sub>2 ads</sub> |
|----------------------------|-----------|------------------------------|-------------------|-----------|-------------------------------|---------------------|
| Croda 1                    | 0.47±0.07 | 0.27±0.05                    | 0.2±0.05          | 0.07±0.02 | 0.05±0.01                     | 0.07±0.01           |
| Croda 1 + H <sub>2</sub> O | 0.65±0.08 | 0.35±0.07                    | 0.30±0.04         | -         | -                             | -                   |
| Croda 2                    | 0.28±0.07 | 0.17±0.05                    | 0.11±0.05         | 0.07±0.01 | 0.07±0.01                     | N.D.                |
| Croda 2 + H <sub>2</sub> O | 0.21±0.04 | N.D.                         | 0.21±0.04         | -         | -                             | -                   |

**Table S5:** N and S concentrations on the two TiO<sub>2</sub> nanopowders two hours after exposure to NO or SO<sub>2</sub>/Ar gas. Note that the effect of water on SO<sub>2</sub> adsorption was not measured.

### Calculation of Mn overlayer thickness.

Without STM measurements the nature of the Mn growth is not easy to determine. An estimate of the overlayer thickness can, however, be made assuming a continuous, uniform film of Mn on top of the TiO<sub>2</sub> substrate, using a two-layer model using the equation below[3];

$$\frac{I_{Mn2p}}{I_{Ti2p}} = \frac{N_{Mn}}{N_{Ti}} \frac{1 - \exp\left\{-\frac{d_{Mn}}{\lambda_{Mn}(E_{Mn})\cos\theta}\right\}}{\exp\left\{-\frac{d_{Mn}}{\lambda_{Mn}(E_{Ti})\cos\theta}\right\}},$$

where  $d_{Mn}$  is the thickness of the Mn overlayer,  $\lambda_{Mn}(E_{Mn})$  is the inelastic mean-free path (IMFP) of Mn 2p electrons through the Mn overlayer at the kinetic energy of the Mn 2p photoelectrons = 1.5 nm.  $\lambda_{Mn}(E_{Ti})$  is the IMFP of Ti 2p electrons through the Mn overlayer at the energy of the Ti 2p photoelectrons = 1.7 nm,  $N_{Mn} = 47/\text{nm}^3$ , and  $N_{Ti} = 32/\text{nm}^3$  are the number densities of Mn and Ti atoms in the overlayer and TiO<sub>2</sub> substrate, and  $I_{Mn2p}$  and  $I_{Ti2p}$  are the intensities of the Mn 2p and Ti 2p photoemission peaks, corrected for the photoionisation cross-sections, analyser transmission function and sampling depth at the relevant kinetic energies. Since all of the measurements were performed in a normal emission geometry  $\theta=0$ , so  $\cos\theta=1$ . This gives Mn overlayer thicknesses of 0.2 nm for the s-TiO<sub>2</sub> and 0.4 nm for the r-TiO<sub>2</sub> single crystal.

## References.

1. Biesinger, M. C.; Payne, B. P.; Grosvenor, A. P.; Lau, L. W. M.; Gerson, A. R.; Smart, R. S. C. Resolving Surface Chemical States in XPS Analysis of First Row Transition Metals, Oxides and Hydroxides: Cr, Mn, Fe, Co and Ni. *Applied Surface Science*, **257** (2011), 2717–2730.  
<https://doi.org/10.1016/j.apsusc.2010.10.051>.
2. Jackman, M.J., Thomas, A.G., Murny, C., Photoelectron Spectroscopy Study of Stoichiometric and Reduced Anatase TiO<sub>2</sub>(101) Surfaces: The Effect of Subsurface Defects on Water Adsorption at Near-Ambient Pressures. *The Journal of Physical Chemistry C* 119, (2015), 13682–13690.  
<https://doi.org/10.1021/acs.jpcc.5b02732>.
3. Briggs and Seah, *Practical Surface Analysis: Auger and Photoelectron Spectroscopy* 2<sup>nd</sup> Edition (1990), John Wiley and Sons, Chichester.
